# Supplementary material for: TRIM25 regulates oxaliplatin resistance in colorectal cancer by promoting EZH2 stability
Source: Research Square preprint supplement (doi:10.21203/rs.3.rs-60545/v2), 2020-11-24
Supplement: Supplementary file 1 [file 9078971b689d8de7e661cb5a.docx]

**Supplementary Figure S1**. TRIM25 predicts recurrence and poor prognosis of patients with CRC treated with OXA-based chemotherapy.


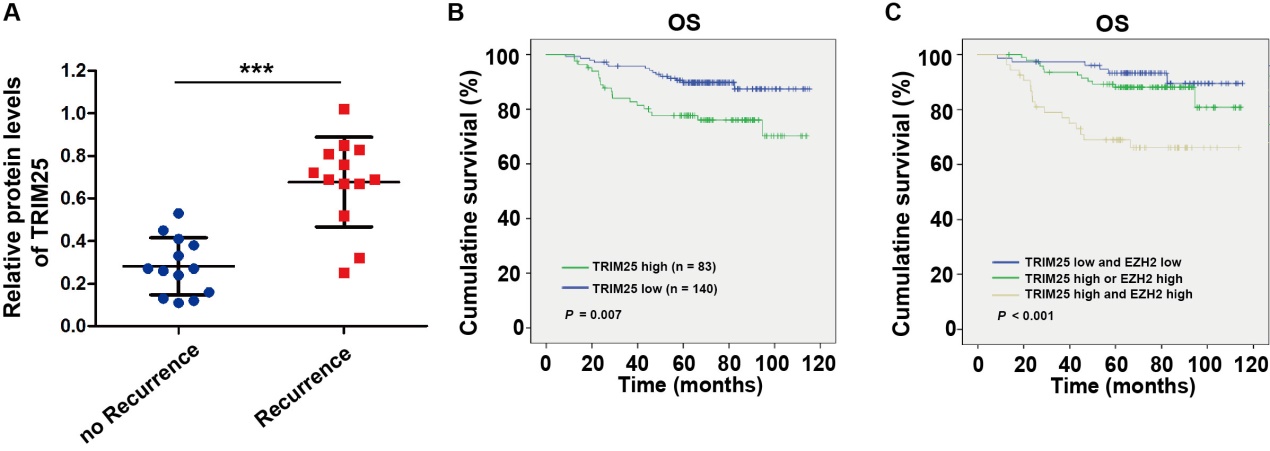


**Supplementary Figure S2**. Western blotting analysis of stem cell markers in TRIM25-knockdown /-overexpressing CRC cells.
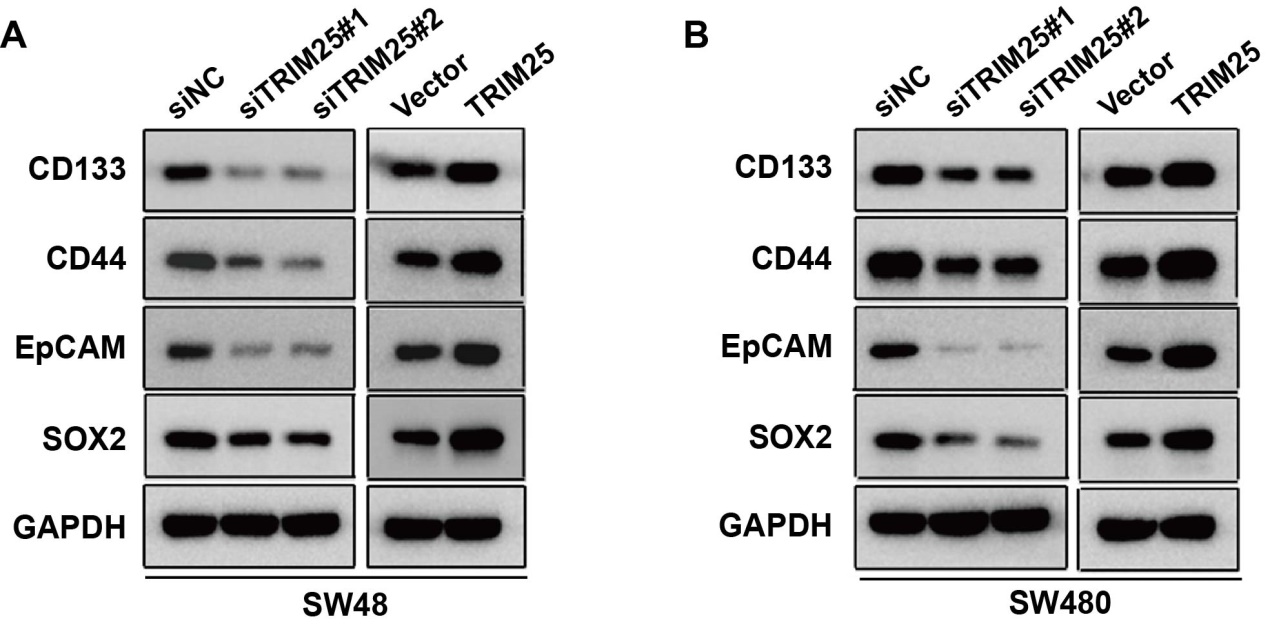


**Supplementary Figure S3**. TRIM25 regulates the ubiquitination of EZH2.

**
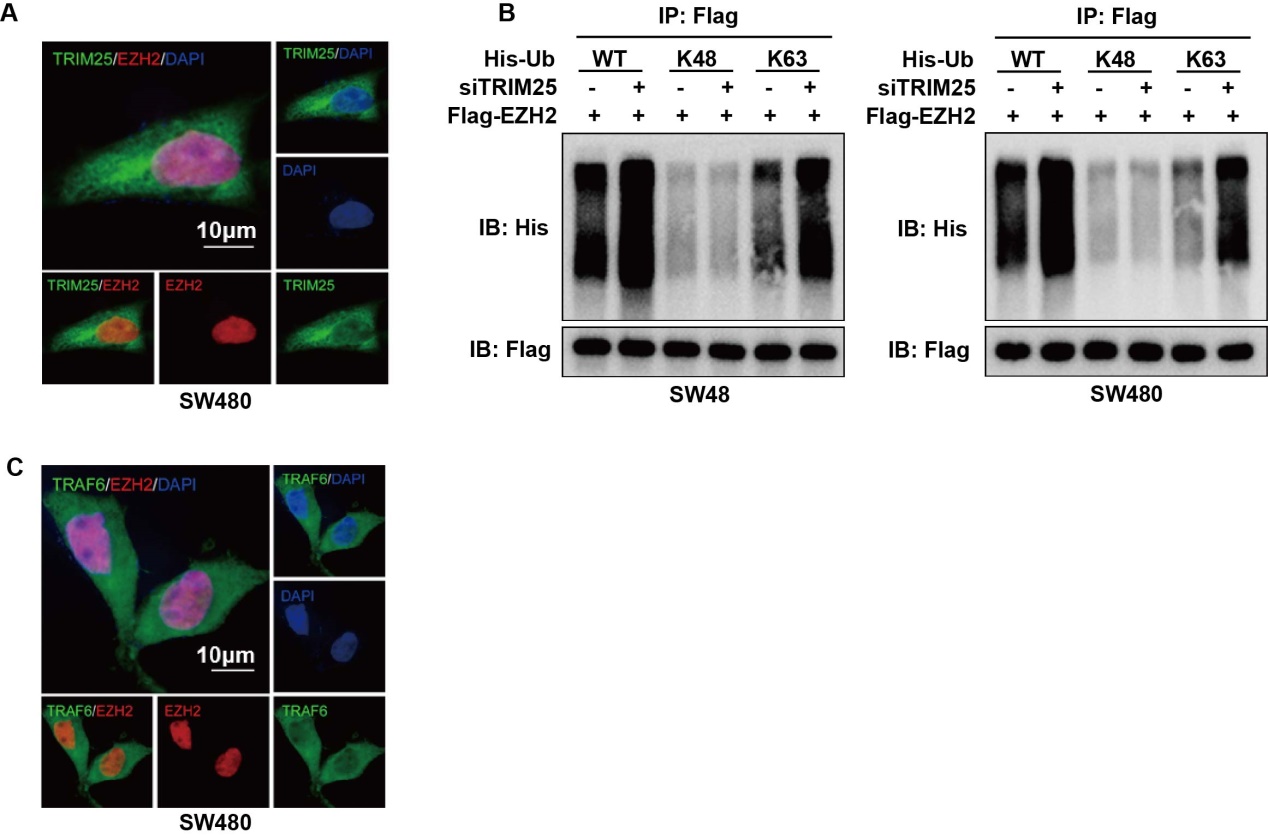
**
